# Supplementary material for: B cells modulate lung antiviral inflammatory responses via the neurotransmitter acetylcholine
Source: Research Square preprint supplement (doi:10.21203/rs.3.rs-4421566/v1), 2024-06-25
Supplement: Supplementary file 1 [file 91db20564f0e853a7d84301b.pdf]

| <b>Antibody reagent</b>      | <b>Clone</b>    | <b>Source and REF</b>  |
|------------------------------|-----------------|------------------------|
| Anti-mouse CD3-AF700         | 17A2            | BD Biosciences 561388  |
| Anti-mouse CD4-PacBlue       | GK1.5           | Made in-house          |
| Anti-mouse CD4-BIOT          | GK1.5           | Made in-house          |
| Anti-mouse CD5-PE            | 53-7.3          | Made in-house          |
| Anti-mouse CD8a-PacBlue      | 53-6.7.3.1      | Made in-house          |
| Anti-mouse CD8a-BIOT         | 53-6.7.3.1      | Made in-house          |
| Anti-mouse CD9-BIOT          | MZ3             | BioLegend 124803       |
| Anti-mouse CD11b Biotin      | M1/70           | Made in-house          |
| Anti-mouse CD11b BV605       | M1/70           | BioLegend 101237       |
| Anti-mouse CD11c-BUV737      | N418            | Invitrogen 3670-114-82 |
| Anti-mouse CD19-PECF594      | D3              | BD Bioscience 562329   |
| Anti-mouse CD19-BUV737       | D3              | BD Biosciences 612782  |
| Anti-mouse CD19-BV786        | D3              | BD Biosciences 563333  |
| Anti-mouse CD23 BV605        | B3B4            | BD Biosciences 747727  |
| Anti-mouse CD24-BV711        | M1/69           | BD Biosciences 563450  |
| Anti-mouse CD38-PE-DAZZLE594 | 90              | BioLegend 102729       |
| Anti-mouse CD43-APC          | S7              | BD Biosciences 560663  |
| Anti-mouse CD43-BV650        | S7              | BD Biosciences 740464  |
| Anti-mouse CD44-BV711        | IM7             | BioLegend 103057       |
| Anti-mouse CD45R-BV605       | RA3-6B2         | BD Biosciences 563708  |
| Anti-mouse CD45R-BUV661      | RA3-6B2         | BD Biosciences 612972  |
| Anti-mouse CD64-APC-eF780    | X54-5/7.1       | Invitrogen 47-0641-82  |
| Anti-mouse CD62L-PE          | MEL-14          | BioLegend 104407       |
| Anti-mouse CD86-BV650        | GL-1            | BD Biosciences 564200  |
| Anti-mouse CD90.2-BIOT       | 53-2.1          | Made in-house          |
| Anti-mouse CD90.2-PacBlue    | 53-2.1          | Made in-house          |
| Anti-mouse F4/80-BIOT        | BM-8            | Made in-house          |
| Anti-mouse F4/80-PacBlue     | BM-8            | Made in-house          |
| Anti-mouse F4/80-PECy5       | BM-8            | Biolegend 123111       |
| Anti-mouse Ly6G/C-PacBlue    | RB6-8C5 or Gr-1 | Made in-house          |
| Anti-mouse Ly6G/C-BIOT       | RB6-8C5 or Gr-1 | Made in-house          |
| Anti-mouse Ly6G-BV421        | 1A8             | BioLegend 127627       |
| Anti-mouse NK1.1-PacBlue     | PK136           | Made in-house          |
| Anti-mouse NK1.1-BIOT        | PK136           | Made in-house          |
| Anti-mouse IgM-APC           | 331             | Made in-house          |
| Anti-mouse IgM-FITC          | 331             | Made in-house          |
| Anti-mouse IgM-APC-Cy7       | 331             | Made in-house          |
| Anti-mouse CD137 BV605       | 281-2           | BD Biosciences 563147  |
| Anti-mouse IRF4-PECy7        | IRF4.3E4        | Biolegend 646413       |
| Anti-mouse IRF8-PerCP-eF710  | V3GYWCH         | Invitrogen 46-9852-82  |
| Anti-mouse CD95-BUV395       | Jo2             | BD Biosciences 740254  |
| Anti-mouse TACI-PE           | 8F10            | BioLegend 133403       |
| Anti-mouse TACI-BV421        | 8F10            | BD Biosciences 742840  |

[illegible]
